# Supplementary material for: Exercise and/or Genistein Do Not Revert 24-Week High-Fat, High-Sugar Diet-Induced Gut Microbiota Diversity Changes in Male C57BL/6J Adult Mice
Source: MDPI journal article supplement (doi:10.3390/microorganisms10112221), 2022-11-10
Supplement: s1 [file s1]

Supplementary tables

**Table S1. Jaccard distance matrix pairwise-comparisons between HFD+chow, chow, HFD, HFD+Gen, HFD+Exe, and HFD+Gen+Exe after 24 weeks of six different 24-week dietary and exercise**

| Group 1  | Group 2     | Pseudo-F   | p-value | q-value    |
|----------|-------------|------------|---------|------------|
| HFD+chow | HFD         | 9.59703999 | 0.001   | 0.00107143 |
| HFD+chow | HFD +Gen    | 9.12753845 | 0.001   | 0.00107143 |
| HFD+chow | HFD+Exe     | 11.0687531 | 0.001   | 0.00107143 |
| HFD+chow | HFD+Gen+Exe | 8.14320355 | 0.001   | 0.00107143 |
| HFD+chow | Chow        | 4.66159369 | 0.001   | 0.00107143 |
| HFD      | HFD +Gen    | 3.34386645 | 0.001   | 0.00107143 |
| HFD      | HFD+Exe     | 2.65870412 | 0.001   | 0.00107143 |
| HFD      | HFD+Gen+Exe | 2.43799975 | 0.002   | 0.002      |
| HFD      | Chow        | 11.881784  | 0.001   | 0.00107143 |
| HFD +Gen | HFD+Exe     | 3.23250204 | 0.001   | 0.00107143 |
| HFD +Gen | HFD+Gen+Exe | 2.39218954 | 0.001   | 0.00107143 |
| HFD +Gen | Chow        | 10.6219254 | 0.001   | 0.00107143 |
| HFD+Exe  | HFD+Gen+Exe | 2.59137522 | 0.001   | 0.00107143 |
| HFD+Exe  | Chow        | 13.3345591 | 0.001   | 0.00107143 |

**Table S2. Unweighted Unifrac pairwise-comparisons between HFD+chow, chow, HFD, HFD+Gen, HFD+Exe, and HFD+Gen+Exe after 24 weeks of six different 24-week dietary and exercise**

| Group 1  | Group 2     | Pseudo-F   | p-value | q-value    |
|----------|-------------|------------|---------|------------|
| HFD+chow | HFD         | 12.1230352 | 0.001   | 0.00125    |
| HFD+chow | HFD +Gen    | 10.1686063 | 0.001   | 0.00125    |
| HFD+chow | HFD+Exe     | 12.4506619 | 0.001   | 0.00125    |
| HFD+chow | HFD+Gen+Exe | 9.74305948 | 0.001   | 0.00125    |
| HFD+chow | Chow        | 4.30379276 | 0.001   | 0.00125    |
| HFD      | HFD +Gen    | 4.00450051 | 0.001   | 0.00125    |
| HFD      | HFD+Exe     | 3.63841065 | 0.001   | 0.00125    |
| HFD      | HFD+Gen+Exe | 2.2794148  | 0.016   | 0.016      |
| HFD      | Chow        | 16.4930738 | 0.001   | 0.00125    |
| HFD +Gen | HFD+Exe     | 3.19899435 | 0.001   | 0.00125    |
| HFD +Gen | HFD+Gen+Exe | 2.86568999 | 0.008   | 0.00857143 |
| HFD +Gen | Chow        | 13.9254802 | 0.001   | 0.00125    |
| HFD+Exe  | HFD+Gen+Exe | 2.64860284 | 0.003   | 0.00346154 |
| HFD+Exe  | Chow        | 18.1948234 | 0.001   | 0.00125    |

**Table S3. Bray-Curtis distance matrix pairwise-comparisons between HFD+chow, chow, HFD, HFD+Gen, HFD+Exe, and HFD+Gen+Exe after 24 weeks of six different 24-week dietary and exercise**

| <b>Group 1</b> | <b>Group 2</b> | <b>Pseudo-F</b> | <b>p-value</b> | <b>q-value</b> |
|----------------|----------------|-----------------|----------------|----------------|
| HFD+chow       | HFD            | 9.06653468      | 0.001          | 0.00166667     |
| HFD+chow       | HFD +Gen       | 8.60757279      | 0.001          | 0.00166667     |
| HFD+chow       | HFD+Exe        | 9.17550596      | 0.001          | 0.00166667     |
| HFD+chow       | HFD+Gen+Exe    | 6.59896651      | 0.001          | 0.00166667     |
| HFD+chow       | Chow           | 4.0343831       | 0.001          | 0.00166667     |
| HFD            | HFD +Gen       | 2.45956853      | 0.027          | 0.03115385     |
| HFD            | HFD+Exe        | 2.58367891      | 0.017          | 0.02125        |
| HFD            | HFD+Gen+Exe    | 1.20595206      | 0.258          | 0.258          |
| HFD            | Chow           | 11.016827       | 0.001          | 0.00166667     |
| HFD +Gen       | HFD+Exe        | 3.783856        | 0.005          | 0.0075         |
| HFD +Gen       | HFD+Gen+Exe    | 2.72637416      | 0.017          | 0.02125        |
| HFD +Gen       | Chow           | 10.6658116      | 0.001          | 0.00166667     |
| HFD+Exe        | HFD+Gen+Exe    | 1.95278348      | 0.059          | 0.06321429     |
| HFD+Exe        | Chow           | 8.42353822      | 0.001          | 0.00166667     |
|                |                |                 |                |                |

**Table S4. Weighted Unifrac pairwise-comparisons between HFD+chow, chow, HFD, HFD+Gen, HFD+Exe, and HFD+Gen+Exe after 24 weeks of six different 24-week dietary and exercise**

| <b>Group 1</b> | <b>Group 2</b> | <b>Pseudo-F</b> | <b>p-value</b> | <b>q-value</b> |
|----------------|----------------|-----------------|----------------|----------------|
| HFD+chow       | HFD            | 6.81085704      | 0.001          | 0.003          |
| HFD+chow       | HFD +Gen       | 7.76190527      | 0.001          | 0.003          |
| HFD+chow       | HFD+Exe        | 5.86103833      | 0.003          | 0.00642857     |
| HFD+chow       | HFD+Gen+Exe    | 4.76080063      | 0.002          | 0.005          |
| HFD+chow       | Chow           | 2.37328375      | 0.074          | 0.0925         |
| HFD            | HFD +Gen       | 2.33968388      | 0.07           | 0.0925         |
| HFD            | HFD+Exe        | 1.85529656      | 0.111          | 0.12807692     |
| HFD            | HFD+Gen+Exe    | 1.0615309       | 0.344          | 0.344          |
| HFD            | Chow           | 7.23363861      | 0.001          | 0.003          |
| HFD +Gen       | HFD+Exe        | 3.34333991      | 0.018          | 0.027          |
| HFD +Gen       | HFD+Gen+Exe    | 3.34990047      | 0.018          | 0.027          |
| HFD +Gen       | Chow           | 10.5353498      | 0.001          | 0.003          |
| HFD+Exe        | HFD+Gen+Exe    | 1.35804993      | 0.228          | 0.24428571     |
| HFD+Exe        | Chow           | 4.33439303      | 0.005          | 0.009375       |
|                |                |                 |                |                |
